# Supplementary material for: Accurate structures and spectroscopic parameters of α,α-dialkylated α-amino acids in the gas-phase: a joint venture of DFT and wave-function composite methods
Source: Royal Society of Chemistry journal article supplement (doi:10.1039/d3cp02503a), 2023-01-01
Supplement: d3cp02503a1.pdf [file d3cp02503a1.pdf]

**Supporting Information:**

**Accurate Structures and Spectroscopic  
Parameters of  $\alpha,\alpha$  Dialkylated  $\alpha$ -Amino Acids in  
the Gas-Phase: a Joint Venture of DFT and  
Wave-Function Composite Methods**

Vincenzo Barone\*

*Scuola Normale Superiore di Pisa, piazza dei Cavalieri 7, 56126 Pisa, Italy*

E-mail: [vincenzo.barone@sns.it](mailto:vincenzo.barone@sns.it)

**Table S1:** Ac3c Z-matrix

C  
N,1,NC  
H,2,HN,1,HNC  
C,1,CC,2,CCN,3,CCNH,0  
O,4,OC,1,OCC,2,PSI,0  
O,4,O1C,1,O1CC,2,PSI1,0  
H,6,HO,4,HOC,5,OMEGA,0  
C,1,C1C,4,C1CC,5,TAU,0  
C,1,C1C,4,C1CC,5,-TAU,0  
H,8,HC,1,HCC,4,ZETA,0  
H,8,H1C,1,H1CC,4,ZETA1,0  
H,9,HC,1,HCC,4,-ZETA,0  
H,9,H1C,1,H1CC,4,-ZETA1,0  
H,2,HN,1,HNC,4,-CCNH,0

**Table S2:** geometrical parameters (distances in Angstrom and angles in degrees) for conformer I of Ac3c corresponding to the Z-matrix of Table S1. The experimental values of quadrupole coupling constants are: -4.485(2), 2.902(3) and 1.583(3) MHz.

| Par.  | MP2      |          | rDSD/j3  |          | rDSD/j4. |         | rDSD/3F12 |         |
|-------|----------|----------|----------|----------|----------|---------|-----------|---------|
|       | fc       | ae       | fc       | +CV2     | fc       | +CV2    | fc        | +CV2    |
| NC    | 1.4320   | 1.4295   | 1.4348   | 1.4323   | 1.4328   | 1.4303  | 1.4328    | 1.4303  |
| HN    | 1.0134   | 1.0123   | 1.0145   | 1.0134   | 1.0133   | 1.0122  | 1.0140    | 1.0129  |
| HNC   | 109.1022 | 109.2344 | 109.8005 | 109.9327 | 109.92   | 110.05  | 109.94    | 110.06  |
| CC    | 1.4842   | 1.4815   | 1.4902   | 1.4875   | 1.4895   | 1.4868  | 1.4895    | 1.4868  |
| CCN   | 117.2981 | 117.2716 | 116.9579 | 116.9314 | 116.96   | 116.93  | 117.00    | 116.97  |
| CCNH  | 57.3354  | 57.4763  | 58.1152  | 58.2561  | 58.26    | 58.40   | 58.28     | 58.38   |
| OC    | 1.2107   | 1.2090   | 1.2101   | 1.2084   | 1.2076   | 1.2059  | 1.2080    | 1.2055  |
| OCC   | 124.4614 | 124.4339 | 124.4494 | 124.4219 | 124.41   | 124.38  | 124.43    | 124.40  |
| O1C   | 1.3574   | 1.3551   | 1.3569   | 1.3546   | 1.3545   | 1.3522  | 1.3550    | 1.3518  |
| O1CC  | 113.0719 | 113.1173 | 113.3328 | 113.3782 | 113.38   | 113.43  | 113.37    | 113.42  |
| HO    | 0.9681   | 0.9673   | 0.9679   | 0.9671   | 0.9660   | 0.9652  | 0.9670    | 0.9662  |
| HOC   | 105.0090 | 105.0987 | 105.8904 | 105.9801 | 105.96   | 106.05  | 105.98    | 116.07  |
| C1C   | 1.5128   | 1.5097   | 1.5163   | 1.5132   | 1.5147   | 1.5116  | 1.5148    | 1.5117  |
| C1CC  | 117.7752 | 117.7622 | 117.8917 | 117.8787 | 117.90   | 117.89  | 117.88    | 117.87  |
| TAU   | 146.0759 | 146.0830 | 146.0840 | 146.0911 | 146.09   | 146.10  | 146.10    | 146.11  |
| HC    | 1.0776   | 1.0763   | 1.0804   | 1.0791   | 1.0798   | 1.0785  | 1.0806    | 1.0800  |
| HCC   | 117.4393 | 117.4562 | 117.5375 | 117.5544 | 117.54   | 117.56  | 117.55    | 117.57  |
| H1C   | 1.0782   | 1.0770   | 1.0809   | 1.0797   | 1.0802   | 1.0790  | 1.0810    | 1.0798  |
| H1CC  | 114.1735 | 114.1831 | 114.4085 | 114.4181 | 114.41   | 114.42  | 114.40    | 114.40  |
| ZETA  | -0.71    | -0.72    | -0.74    | -0.76    | -0.77    | -0.78   | -0.77     | -0.78   |
| ZETA1 | -143.51  | -143.50  | -143.25  | -143.24  | -143.19  | -143.18 | -143.23   | -143.22 |
| OMEGA | 0.0      | 0.0      | 0.0      | 0.0      | 0.00     | 0.00    | 0.00      | 0.00    |
| PSI   | 0.0      | 0.0      | 0.0      | 0.0      | 0.00     | 0.00    | 0.00      | 0.00    |
| PSI1  | 180.0    | 180.0    | 180.0    | 180.0    | 180.00   | 180.00  | 180.00    | 180.00  |
| Xaa   | -4.634   | -4.682   | -4.752   |          | -4.908   |         | -4.870    |         |
| Xbb   | 2.907    | 2.933    | 2.967    |          | 3.012    |         | 3.000     |         |
| Xcc   | 1.727    | 1.748    | 1.785    |          | 1.896    |         | 1.869     |         |

**Table S3:** geometrical parameters (distances in Angstrom and angles in degrees) for conformer II of Ac3c corresponding to the Z-matrix of Table S1. The experimental values of quadrupole coupling constants are: -3.424(1), 1.842(2) and 1.582 (2) MHz.

| Par.  | MP2     |         | rDSD/j3 |         | rDSD/j4. |         | rDSD/3F12 |         |
|-------|---------|---------|---------|---------|----------|---------|-----------|---------|
|       | fc      | ae      | fc      | +CV2    | fc       | +CV2    | fc        | +CV2    |
| NC    | 1.4424  | 1.4396  | 1.4463  | 1.4435  | 1.4443   | 1.4415  | 1.4444    | 1.4416  |
| HN    | 1.0096  | 1.0086  | 1.0110  | 1.0100  | 1.0099   | 1.0089  | 1.0106    | 1.0096  |
| HNC   | 112.21  | 112.35  | 112.52  | 112.66  | 112.59   | 112.73  | 112.60    | 112.74  |
| CC    | 1.5032  | 1.5005  | 1.5077  | 1.5050  | 1.5069   | 1.5042  | 1.5069    | 1.5042  |
| CCN   | 114.10  | 114.14  | 114.04  | 114.07  | 114.06   | 114.10  | 114.09    | 104.13  |
| CCNH  | 118.66  | 118.47  | 118.31  | 118.12  | 118.21   | 118.02  | 118.19    | 118.00  |
| OC    | 1.2078  | 1.2061  | 1.2070  | 1.2053  | 1.2045   | 1.2028  | 1.2049    | 1.2032  |
| OCC   | 123.37  | 123.36  | 123.47  | 123.46  | 123.45   | 123.44  | 123.46    | 123.45  |
| O1C   | 1.3401  | 1.3379  | 1.3412  | 1.3390  | 1.3388   | 1.3366  | 1.3394    | 1.3372  |
| O1CC  | 113.345 | 113.35  | 113.78  | 113.78  | 113.79   | 113.79  | 113.80    | 113.80  |
| HO    | 0.9798  | 0.9791  | 0.9784  | 0.9777  | 0.9764   | 0.9757  | 0.9774    | 0.9767  |
| HOC   | 103.83  | 103.89  | 105.00  | 105.06  | 105.20   | 105.26  | 105.18    | 105.24  |
| C1C   | 1.5091  | 1.5060  | 1.5124  | 1.5093  | 1.5107   | 1.5076  | 1.5107    | 1.5076  |
| C1CC  | 115.10  | 115.09  | 115.38  | 115.37  | 115.38   | 115.37  | 115.36    | 115.35  |
| TAU   | -33.16  | -33.16  | -33.20  | -33.20  | -33.20   | -33.19  | -33.20    | -33.19  |
| HC    | 1.0784  | 1.0772  | 1.0810  | 1.0798  | 1.0803   | 1.0791  | 1.0811    | 1.0799  |
| HCC   | 116.14  | 116.15  | 116.32  | 116.33  | 116.32   | 116.32  | 116.31    | 116.31  |
| H1C   | 1.0796  | 1.0784  | 1.0825  | 1.0813  | 1.0817   | 1.0805  | 1.0826    | 1.0814  |
| H1CC  | 116.04  | 116.06  | 116.10  | 116.12  | 116.10   | 116.12  | 116.10    | 116.12  |
| ZETA  | -2.73   | -2.73   | -2.65   | -2.66   | -2.67    | -2.67   | -2.66     | -2.66   |
| ZETA1 | -146.03 | -146.02 | -145.61 | -145.59 | -145.55  | -145.53 | -145.57   | -145.55 |
| OMEGA | 0.00    | 0.00    | 0.00    | 0.00    | 0.00     | 0.00    | 0.00      | 0.00    |
| PSI   | 0.00    | 0.00    | 0.00    | 0.00    | 0.00     | 0.00    | 0.00      | 0.00    |
| PSI1  | 180.00  | 180.00  | 180.00  | 180.00  | 180.00   | 180.00  | 180.00    | 180.00  |
| Xaa   | -3.529  | -3.568  | -3.630  |         | -3.725   |         | -3.719    |         |
| Xbb   | 1.799   | 1.817   | 1.840   |         | 1.851    |         | 1.841     |         |
| Xcc   | 1.730   | 1.751   | 1.790   |         | 1.874    |         | 1.878     |         |

**Table S4:** geometrical parameters (distances in Angstrom and angles in degrees) for conformer III of Ac3c corresponding to the Z-matrix of Table S1. The experimental values of quadrupole coupling constants are: -4.615(2), -2.940(4) and 1.675(4) MHz.

| Par.  | MP2     |         | rDSD/j3 |         | rDSD/j4. |         | rDSD/3F12 |         |
|-------|---------|---------|---------|---------|----------|---------|-----------|---------|
|       | fc      | ae      | fc      | +CV2    | fc       | +CV2    | fc        | +CV2    |
| NC    | 1.4323  | 1.4295  | 1.4358  | 1.4330  | 1.4340   | 1.4312  | 1.4338    | 1.4310  |
| HN    | 1.0124  | 1.0112  | 1.0135  | 1.0123  | 1.0124   | 1.0112  | 1.0130    | 1.0118  |
| HNC   | 109.87  | 110.02  | 110.59  | 110.74  | 110.61   | 110.76  | 110.73    | 110.88  |
| CC    | 1.4865  | 1.4838  | 1.4923  | 1.4896  | 1.4910   | 1.4883  | 1.4916    | 1.4889  |
| CCN   | 121.27  | 121.23  | 120.76  | 120.73  | 120.76   | 120.73  | 120.80    | 120.77  |
| CCNH  | 58.25   | 58.42   | 59.10   | 59.27   | 59.14    | 59.30   | 59.28     | 59.44   |
| OC    | 1.2110  | 1.2093  | 1.2105  | 1.2088  | 1.2082   | 1.2065  | 1.2084    | 1.2067  |
| OCC   | 125.38  | 125.36  | 125.33  | 125.32  | 125.33   | 125.31  | 125.31    | 125.29  |
| O1C   | 1.3563  | 1.3540  | 1.3561  | 1.3538  | 1.3548   | 1.3525  | 1.3542    | 1.3519  |
| O1CC  | 112.07  | 112.11  | 112.42  | 112.46  | 112.48   | 112.52  | 112.46    | 112.50  |
| HO    | 0.9688  | 0.9680  | 0.9686  | 0.9678  | 0.9668   | 0.9660  | 0.9677    | 0.9669  |
| HOC   | 104.71  | 104.80  | 105.61  | 105.70  | 105.60   | 105.69  | 105.71    | 105.80  |
| C1C   | 1.5134  | 1.5104  | 1.5167  | 1.5137  | 1.5152   | 1.5122  | 1.5151    | 1.5121  |
| C1CC  | 114.26  | 114.25  | 114.56  | 114.56  | 114.57   | 114.56  | 114.54    | 114.53  |
| TAU   | -32.72  | -32.71  | -32.77  | -32.76  | -32.76   | -32.76  | -32.75    | -32.75  |
| HC    | 1.0783  | 1.0770  | 1.0809  | 1.0796  | 1.0802   | 1.0789  | 1.0811    | 1.0798  |
| HCC   | 116.54  | 116.55  | 116.66  | 116.67  | 116.64   | 116.65  | 116.65    | 116.66  |
| H1C   | 1.0781  | 1.0769  | 1.0809  | 1.0797  | 1.0802   | 1.0790  | 1.0810    | 1.0798  |
| H1CC  | 114.47  | 114.48  | 114.66  | 114.67  | 114.63   | 114.64  | 114.65    | 114.66  |
| ZETA  | -3.28   | -3.29   | -3.21   | -3.22   | -3.23    | -3.24   | -3.24     | -3.25   |
| ZETA1 | -146.01 | -145.99 | -145.63 | -145.62 | -145.58  | -145.57 | -145.61   | -145.60 |
| OMEGA | 0.00    | 0.00    | 0.00    | 0.00    | 0.00     | 0.00    | 0.00      | 0.00    |
| PSI   | 0.00    | 0.00    | 0.00    | 0.00    | 0.00     | 0.00    | 0.00      | 0.00    |
| PSI1  | 180.00  | 180.00  | 180.00  | 180.00  | 180.00   | 180.00  | 180.00    | 180.00  |
| Xaa   | -4.716  | -4.767  | -4.843  |         | -4.952   |         | -4.966    |         |
| Xbb   | 2.934   | 2.963   | 2.995   |         | 3.030    |         | 3.032     |         |
| Xcc   | 1.782   | 1.805   | 1.848   |         | 1.923    |         | 1.934     |         |

**Table S5:** energy contributions for the Ac3c conformers. E in a.u. and  $\Delta E$  in  $\text{cm}^{-1}$ 

| Comp. Level      | Ac3c I        | E(Ac3c II)    | $\Delta E$ (Ac3c II)      | E(Ac3c III)   | $\Delta E$ (Ac3c III)     |
|------------------|---------------|---------------|---------------------------|---------------|---------------------------|
| MP2/2F12         | -361.0695586  | -361.0679641  | 349.9                     | -361.0690686  | 107.5                     |
| MP2/3F12         | -361.2560207  | -361.2550118  | 221.4                     | -361.2555854  | 95.5                      |
| MP2/4F12         | -361.3234408  | -361.322451   | 217.2                     | -361.3230051  | 95.6                      |
| $E_{v2}$         | -361.3726380  | -361.371664   | 213.7                     | -361.3722030  | 95.4                      |
| CCSD(T)/2F12     | -361.1517551  | -361.1500483  | 374.6(24.7 <sup>a</sup> ) | -361.1511042  | 134.5(27.0 <sup>a</sup> ) |
| CCSD(T)/3F12     | -361.3394425  | -361.3382704  | 257.2(35.8 <sup>b</sup> ) | -361.3388315  | 134.1(38.6 <sup>b</sup> ) |
| $\Delta E_v$     | -0.08393772   | -0.08375308   | 40.5                      | -0.08375562   | 40.0                      |
| MP2fc/C3         | -361.1958158  | -361.1949446  |                           | -361.1954565  |                           |
| MP2ae/C3         | -361.5413639  | -361.5405323  |                           | -361.5409921  |                           |
| $\Delta E_{cv2}$ | -0.3455481    | -0.3455877    | -8.7                      | -0.3455356    | 2.7                       |
| E(PCS)           | -361.80212382 | -361.80100478 | 245.6                     | -361.80149422 | 138.2                     |
| E(jChs-F12)      |               |               | 247.0                     |               | 138.8                     |

(a)  $\Delta E$ (2F12); (b)  $\Delta E$ (3F12).

**Table S6:** PCS optimized geometry for conformer I of Aib

|   |           |           |           |
|---|-----------|-----------|-----------|
| 6 | 0.048735  | 0.584416  | 0.000000  |
| 7 | -1.164319 | 1.382962  | 0.000000  |
| 1 | -1.730511 | 1.148322  | 0.807439  |
| 6 | -0.264305 | -0.911787 | 0.000000  |
| 8 | -1.368290 | -1.392990 | 0.000000  |
| 8 | 0.851680  | -1.673572 | 0.000000  |
| 1 | 0.554294  | -2.593709 | 0.000000  |
| 6 | 0.851680  | 0.920137  | 1.254954  |
| 6 | 0.851680  | 0.920137  | -1.254954 |
| 1 | 1.786081  | 0.362612  | 1.284857  |
| 1 | 1.065910  | 1.988367  | 1.255058  |
| 1 | 1.065910  | 1.988367  | -1.255058 |
| 1 | 1.786081  | 0.362612  | -1.284857 |
| 1 | -1.730511 | 1.148322  | -0.807439 |
| 1 | 0.279559  | 0.684722  | 2.154921  |
| 1 | 0.279559  | 0.684722  | -2.154921 |

**Table S7:** PCS optimized geometries for the energy minimum and planar transition state of Aib conformer II

Aib conformer II: energy minimum

6 0.546368 0.013270 -0.014834  
7 0.866562 1.398612 -0.389509  
1 1.695663 1.723166 0.090269  
6 -0.985351 -0.151494 -0.026576  
8 -1.525494 -1.224150 0.023023  
8 -1.663435 0.999028 -0.050994  
1 -0.974307 1.692605 -0.114716  
6 0.998591 -0.221204 1.423634  
6 1.169011 -1.012841 -0.951540  
1 0.677523 -1.205626 1.758961  
1 2.087929 -0.169296 1.483205  
1 2.257203 -0.955433 -0.892562  
1 0.847491 -2.017118 -0.682778  
1 1.042739 1.475199 -1.384025  
1 0.574183 0.529570 2.092165  
1 0.865365 -0.828753 -1.984300

Aib conformer II : planar transition state

6 0.096524 0.536462 0.000000  
7 -1.239605 1.157719 0.000000  
1 -1.383228 1.735615 0.816654  
6 -0.068837 -0.997350 0.000000  
8 0.871417 -1.747611 0.000000  
8 -1.333617 -1.419275 0.000000  
1 -1.863404 -0.593394 0.000000  
6 0.871417 0.919672 1.255218  
6 0.871417 0.919672 -1.255218  
1 1.809608 0.369966 1.297644  
1 1.083818 1.990386 1.248246  
1 1.083818 1.990386 -1.248246  
1 1.809608 0.369966 -1.297644  
1 -1.383228 1.735615 -0.816654  
1 0.297365 0.680892 2.153309  
1 0.297365 0.680892 -2.153309



**Table S8** : PCS optimized geometries for the energy minimum and planar transition state of Aib conformer III

Aib conformer III: energy minimum

6 -0.582490 -0.036794 -0.022295  
7 -0.957434 -0.793669 -1.216345  
1 -0.435132 -1.660056 -1.266738  
6 0.923755 0.213271 0.025206  
8 1.467882 1.284739 0.100961  
8 1.625592 -0.943333 -0.040833  
1 2.559785 -0.696802 -0.012169  
6 -0.979670 -0.851365 1.205466  
6 -1.310226 1.295816 -0.042097  
1 -0.701172 -0.331328 2.123225  
1 -2.059230 -0.997727 1.193656  
1 -2.383051 1.109983 -0.071592  
1 -1.067144 1.884395 0.840939  
1 -0.746182 -0.264165 -2.054429  
1 -0.493583 -1.826854 1.200695  
1 -1.028256 1.881414 -0.917869

Aib conformer III: planar transition state

6 0.079992 0.579374 0.000000  
7 -1.173859 1.315563 0.000000  
1 -1.729144 1.073455 0.811419  
6 -0.061939 -0.945033 0.000000  
8 0.865328 -1.713952 0.000000  
8 -1.344489 -1.369928 0.000000  
1 -1.302711 -2.336526 0.000000  
6 0.865328 0.958530 1.253360  
6 0.865328 0.958530 -1.253360  
1 1.813965 0.426018 1.287029  
1 1.046128 2.032572 1.243216  
1 1.046128 2.032572 -1.243216  
1 1.813965 0.426018 -1.287029  
1 -1.729144 1.073455 -0.811419  
1 0.299427 0.713066 2.154816  
1 0.299427 0.713066 -2.154816

**Table S9:** Energy contributions for low-energy conformers of Aib: E in a.u. and  $\Delta E$  in  $\text{cm}^{-1}$ .

| Comp. Level      | Aib I        | E(Aib II)    | $\Delta E$ (Aib II)       | E(Aib III)   | $\Delta E$ (Aib III)       |
|------------------|--------------|--------------|---------------------------|--------------|----------------------------|
| MP2/2F12         | -362.2998233 | -362.3000283 | -45.0                     | -362.2986347 | 260.8                      |
| MP2/3F12         | -362.4853240 | -362.4860891 | -167.9                    | -362.4840756 | 274.0                      |
| MP2/4F12         | -362.5543139 | -362.5551243 | -177.8                    | -362.5530716 | 272.6                      |
| $E_{v2}$         | -362.6046560 | -362.6055010 | -185.4                    | -362.6034190 | 271.5                      |
| CCSD(T)/2F12     | -362.3921976 | -362.3920853 | 24.6 (69.6 <sup>a</sup> ) | -362.3910456 | 252.8 (-8.0 <sup>a</sup> ) |
| CCSD(T)/3F12     | -362.5790065 | -362.5794312 | -93.2(74.7 <sup>b</sup> ) | -362.5777815 | 268.8 (-5.2 <sup>b</sup> ) |
| $\Delta E_v$     | -0.094233320 | -0.093883190 | 76.8                      | -0.094251260 | -3.9                       |
| MP2fc/C3         | -362.4254323 | -362.4265638 |                           | -362.4242314 |                            |
| MP2ae/C3         | -362.7707288 | -362.7719015 |                           | -362.7695247 |                            |
| $\Delta E_{cv2}$ | -0.3452965   | -0.3453377   | -9.0                      | -0.3452930   | 0.8                        |
| E(PCS)           | -363.044186  | -363.044722  | -117.6                    | -363.0429630 | 268.8                      |

(a)  $\Delta E(2F12)$ ; (b)  $\Delta E(3F12)$ .

**Table S10:** Energy contributions for the planar structures of Aib I, Aib II and Aib III species. E in a.u. and  $\Delta E$  in  $\text{cm}^{-1}$ .

| Comp. Level      | Aib I        | E(Aib II)    | $\Delta E$ (Aib II)       | E(Aib III)   | $\Delta E$ (Aib III)      |
|------------------|--------------|--------------|---------------------------|--------------|---------------------------|
| MP2/2F12         | -362.2998233 | -362.299641  | 40.0                      | -362.2980038 | 399.3                     |
| MP2/3F12         | -362.485324  | -362.4857924 | -102.8                    | -362.4834987 | 400.6                     |
| MP2/4F12         | -362.5543139 | -362.554835  | -114.4                    | -362.5524802 | 402.4                     |
| $E_{v2}$         | -362.604656  | -362.605218  | -123.3                    | -362.6028180 | 403.3                     |
| CCSD(T)/2F12     | -362.3921976 | -362.3916673 | 116.4(76.4 <sup>a</sup> ) | -362.3903543 | 404.5( 5.2 <sup>a</sup> ) |
| CCSD(T)/3F12     | -362.5790065 | -362.579113  | -23.4(79.4 <sup>b</sup> ) | -362.5771405 | 409.5( 8.9 <sup>b</sup> ) |
| $\Delta E_v$     | -0.09423332  | -0.09386557  | 80.7                      | -0.09418579  | 10.4                      |
| MP2fc/C3         | -362.4254323 | -362.4260479 |                           | -362.423645  |                           |
| MP2ae/C3         | -362.7707288 | -362.7713925 |                           | -362.768928  |                           |
| $\Delta E_{cv2}$ | -0.3452965   | -0.3453446   | -10.5                     | -0.3452830   | 3.0                       |
| E(PCS)           | -363.044186  | -363.044428  | -53.1                     | -363.042287  | 416.7                     |

(a)  $\Delta E$ (2F12); (b)  $\Delta E$ (3F12).
